# Supplementary material for: Molecular design of environmentally benign segmented polyurethane(urea)s: effect of the hard segment component on the molecular aggregation states and biodegradation behavior
Source: Royal Society of Chemistry journal article supplement (doi:10.1039/c3py00172e), 2013-01-01
Supplement: c3py00172e.pdf [file c3py00172e.pdf]

## Electronic Supplementary Information

### **Molecular Design of Environmentally Benign Segmented Polyurethane(urea)s: Effect of the Hard Segment Component on the Molecular Aggregation States and Biodegradation Behavior**

Yoshihiko Oniki,<sup>a</sup> Ken Suzuki,<sup>a</sup> Yuji Higaki,<sup>a,b,c</sup> Ryohei Ishige,<sup>b</sup> Noboru Ohta,<sup>d</sup>  
and Atsushi Takahara\*<sup>a,b,c</sup>

<sup>a</sup> *Graduate School of Engineering, Kyushu University, 744 Motooka, Nishi-ku, Fukuoka 819-0395, Japan.*

<sup>b</sup> *Institute for Materials Chemistry and Engineering, Kyushu University, 744 Motooka, Nishi-ku, Fukuoka 819-0395, Japan.*

<sup>c</sup> *International Institute for Carbon-Neutral Energy Research (WPI-I2CNER), Kyushu University, 744 Motooka, Nishi-ku, Fukuoka 819-0395, Japan.*

<sup>d</sup> *Japan Synchrotron Radiation Research Institute / SPring-8, 1-1-1 Kouto, Sayo-cho, Sayo-gun, Hyogo 679-5198, Japan*

\*To whom correspondence should be addressed

Email address: takahara@cstf.kyushu-u.ac.jp

## 1. WAXD profiles of the SPU(U)s

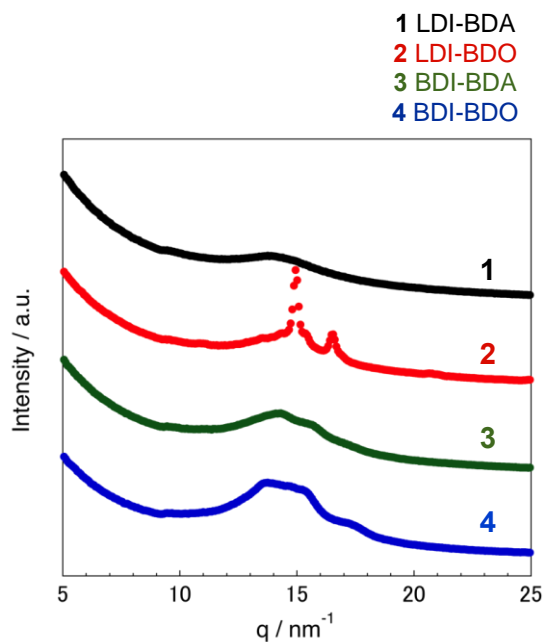

**Fig. S1** Wide angle X-ray diffraction (WAXD) profiles of the SPU(U)s. **1** (black): LDI-BDA, **2** (red): LDI-BDO, **3** (green): BDI-BDA, **4** (blue): BDI-BDO. WAXD measurement was carried out on a RINT 2500V (Rigaku Co., Ltd.) with a Cu- $K_{\alpha}$  X-ray source (40 kV, 200 mA). The wavelength,  $\lambda$ , was 0.1542 nm. The data-collection time was 3 sec per step at  $0.05^{\circ}$  intervals. The scattering vector,  $q = (4\pi/\lambda)\sin\theta$ , where  $\theta$  is the scattering angle, was calibrated by the peak positions of cerium dioxide.

## 2. Bio-degradation characterization of the LDI-BDO by FT-IR spectroscopy

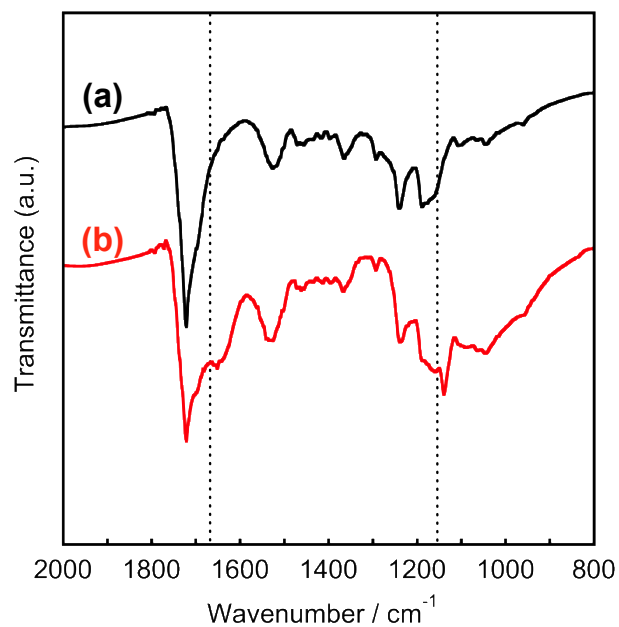

**Fig. S2** FT-IR spectra characterization of the LDI-BDO before and after the degradation test. FT-IR measurements were carried out by Spectrum One spectrometer (PerkinElmer Inc.). The spectra were recorded from 800 to 4000 cm<sup>-1</sup> with a resolution of 1 cm<sup>-1</sup> in transmission mode.
